# 1 No room to roam: King Cobras reduce 2 movement in agriculture

3 Benjamin Michael Marshall<sup>1\*</sup>, Matt Crane<sup>2</sup>, Inês Silva<sup>2</sup>, Colin Thomas Strine<sup>1†</sup>, Max  
4 Dolton Jones<sup>1</sup>, Cameron Wesley Hodges<sup>1</sup>, Pongthep Suwanwaree<sup>1</sup>, Taksin  
5 Artchawakom<sup>3</sup>, Surachit Waengsothorn<sup>4</sup>, Matt Goode<sup>5</sup>

6 <sup>1</sup> Suranaree University of Technology, Nakhon Ratchasima, Thailand

7 <sup>2</sup> King Mongkut's University of Technology Thonburi, Bangkok, Thailand

8 <sup>3</sup> Population and Community Development Association, Bangkok, Thailand

9 <sup>4</sup> Sakaerat Environmental Research Station, Nakhon Ratchasima, Thailand

10 <sup>5</sup> School of Natural Resources and Environment, University of Arizona, Tucson, AZ, USA

11 \* benjaminmichaelmarshall@gmail.com

12 † strine.conservation@gmail.com

## 13 **Abstract**

14 Studying animal movement provides insights into how animals react to land-use changes, specifically  
15 how animals can change their behaviour in agricultural areas. Recent reviews show a tendency for  
16 species to reduce movements in response to increased human landscape modification, but the study of  
17 movement has not been extensively explored in reptiles. We examined movements of a large reptilian  
18 predator, the King Cobra (*Ophiophagus hannah*), in Northeast Thailand. We used a consistent regime  
19 of radio-telemetry tracking to document movements across protected forest and adjacent agricultural  
20 areas. We then adapted GPS-targeting analytic methods to examine the movement using metrics of site  
21 reuse and dynamic Brownian Bridge Movement Model derived motion variance. Examination of  
22 motion variance demonstrated that King Cobra movements increased in forested areas and tended to  
23 decrease in agricultural areas. Our Integrated Step-Selection Functions indicated that when moving in  
24 agricultural areas King Cobras restricted their movements, thereby remaining within vegetated semi-  
25 natural areas, often located along the banks of irrigation canals. Site reuse metrics of residency time and  
26 number of revisits remained unaffected by distance to landscape features. Neither motion variance nor  
27 reuse metrics were consistently affected by the presence of threatening landscape features (e.g. roads,  
28 human settlements); suggesting that King Cobras will remain in close proximity to threats, provided  
29 habitat patches are available. Although King Cobras displayed heterogeneity in their response to  
30 agricultural landscapes, the overall trend suggested a reduction in movements when faced with  
31 fragmented habitat patches embedded in an otherwise inhospitable land-use matrix. Reductions in  
32 movements are consistent with findings for mammals and forest specialist species.

## 33 **Keywords**

34 snake, reptile, *Ophiophagus hannah*, elapid, space-use, step-selection, dBBMM, site fidelity, tropical

## 35 Introduction

36 Examining animal movement can provide important information on conspecific interactions (Jellen et  
37 al. 2007), predator-prey dynamics (Courbin et al. 2016, Vogt et al. 2018), reproductive behaviours  
38 (Kamath and Losos 2018), and responses to anthropogenic threats (Valeix et al. 2012, Loveridge et al.  
39 2017). Additionally, and perhaps most important to conservation planning, is the connection between  
40 movement and resource acquisition (Prange et al. 2004, Mueller et al. 2011, Doherty et al. 2019).  
41 Understanding habitat requirements, via animal movement, can help prioritise areas to protect from  
42 land-use conversion, inform management, and build conservation plans (Fraser et al. 2018).

43 Anthropogenic land-use can alter the ecology of a landscape, changing resources (Arrondo et al. 2018),  
44 modifying behaviour (Gaynor et al. 2018), and introducing novel threats (Robertson et al. 2013). Such  
45 changes can result in increased mortality of species, or even subtler sub-lethal costs (Cottontail et al.  
46 2009, Clark et al. 2011, Karraker et al. 2018). A global review of non-volant mammals revealed that  
47 movements are directly impacted by human landscapes: animals present in human landscapes reduce  
48 movement (Tucker et al. 2018).

49 Despite indications of overall reductions in vagility, the impacts of anthropogenic landscapes on  
50 threatened species is likely to vary. Evolutionary history and key traits are likely to modify a species'  
51 movements in relation to human-dominated landscapes (Fahrig 2007). For example, species that  
52 evolved in continuous habitat (i.e. forest specialists) historically experienced lower costs to large  
53 movements and crossing habitat barriers, potentially resulting in species leaving prime habitat and using  
54 riskier anthropogenic landscapes (Fahrig 2007).

55 Vulnerability in anthropogenic landscapes can be augmented by species traits such as large body size,  
56 parental investment in offspring, habitat specialisation, and low population densities, which have been  
57 connected to increased extinction risk (Purvis et al. 2000, Cardillo 2005, Böhm et al. 2016, Slavenko et  
58 al. 2016, Todd et al. 2017). Species frequently involved in human-wildlife conflict are also more  
59 vulnerable to direct mortality in anthropogenic landscapes (Shankar et al. 2013, Marshall et al. 2018).

60 We aimed to explore the movement patterns of a large-bodied, highly persecuted predator in a mixed-  
61 use landscape. Reptiles' role in ecosystems are underappreciated (Miranda 2017) and, in South East  
62 Asian agricultural systems, likely constitute an important aspect of the remaining wildlife. Few reptile  
63 species fulfil similar ecological functions comparable to large mammals, but King Cobras  
64 (*Ophiophagus hannah* [CANTOR, 1836]) share several traits that could indicate their importance in  
65 ecosystem functioning and vulnerability to habitat modification. Using radio-telemetry, we 1) assess  
66 non-random habitat selection and 2) identify changes in movement patterns within anthropogenic areas  
67 to reveal how King Cobras are potentially adapting to land-use change.

## 68 **Methods and Materials**

### 69 **Field Methods**

70 We studied King Cobras at the Sakaerat Biosphere Reserve located in Nakhon Ratchasima province,  
71 Northeast Thailand (14.44–14.55°N, 101.88–101.95°E). The reserve is comprised of three zones  
72 varying in levels of human-modification: the core zone, protected and fully forested; the buffer zone,  
73 protected and undergoing reforestation; and the transitional zone, an agricultural matrix dominated by  
74 rice, corn and sugar. The transitional zone also contains 159 villages and a four-lane highway that  
75 connects Nakhon Ratchasima to Bangkok. Further descriptions of the study site can be found in Silva  
76 et al. (2018) and Marshall et al. (2018, 2019).

77 The capture and implantation methods, alongside King Cobra measurements, have been previously  
78 described in Marshall et al. (2018, 2019). We tracked individuals four times a day, with approximately  
79 four hours between tracks from 2014-03-22 to 2018-07-28 (06:30, 11:00, 16:00, 20:00; the distribution  
80 of time lags between tracking is available in Supplementary Figure 1). Full details of the tracking  
81 protocols can be found in Silva et al. (2018). We named every individual according to their age class,  
82 sex and capture number (e.g. AM006 = an adult male who was the sixth King Cobra captured).

### 83 **Environmental data**

84 We obtained daily rainfall and temperatures from five weather stations within the Sakaerat Biosphere  
85 Reserve core zone to identify seasons (Sakaerat Environmental Research Station 2018). We averaged  
86 daily readings by station, and ran cluster analysis to generate seasons using the *segclust2D* package  
87 (v.0.2.0 Patin et al. 2018).

88 For the entire study site, we obtained high quality land-use shapefiles from a land survey by the Thai  
89 Land Development Department (Land Development Department, Thailand 2017). We converted  
90 categorical land-use classifications to continuous raster layers, describing Euclidean distances to key  
91 landscape features (i.e., forest, roads, semi-natural areas, settlements, and water bodies). We set the cell  
92 size of the newly created rasters to approximately 10m, which was sufficiently small to detect fine-scale  
93 changes. Semi-natural areas were areas of scrub and vegetation not actively being farmed, often along  
94 field margins, irrigation canals and in disused plots.

### 95 **Motion variance and area estimation**

96 Traditionally, research on reptile spatial ecology has relied on kernel density and minimum convex  
97 polygon approaches to estimate space-use, as a proxy for movements and activity. Kernel density  
98 estimators are problematic, because the technique assumes independence between locations, which can  
99 never be strictly met in radio tracking datasets (Fieberg 2007). Efforts to combat autocorrelation

100 (Worton 1989), lead to a loss of information decreasing the biological relevance of space-use estimates  
101 (De Solla et al. 1999). Dynamic Brownian Bridge Movement Models (dBBMM; Kranstauber et al.  
102 2012) present an alternative that accounts for non-independence of locations and provides a balance  
103 between over- and under-estimating space-use (Silva et al. 2018, 2020b).

104 We used the *move* package (v.3.1.0 Kranstauber et al. 2016) to run dBBMMs estimating motion  
105 variance and the area used by King Cobras. We used the *adehabitatHR* package to extract utilisation  
106 distributions and contours (v.0.4.16 Calenge 2006), and the *rgeos* (v.0.4.2 Bivand and Rundel 2018)  
107 package to estimate the area of contours. We used dBBMMs instead of standard BBMMs, because the  
108 former allowed for estimates of changes in motion variance over time (Horne et al. 2007, Kranstauber  
109 et al. 2012). Following Kranstauber et al. (2012), we selected a window and margin size for dBBMMs  
110 based on a timeframe that was biologically relevant to suspected changes in behavioural states. Due to  
111 our reliance on Very High Frequency (VHF) radio tracking and associated coarse temporal resolution  
112 data, we targeted the identification of activity and sheltering. We were able to detect shifts from activity  
113 to sheltering with slightly greater than one day of radio tracking effort; therefore, we set margin size at  
114 5 data points. A relevant time for a behavioural state to last was approximately one week (i.e. long-term  
115 sheltering); therefore, we set window size to 25 data points. We used GPS error for dBBMM location  
116 error on a point-by-point basis, for points that did not have GPS error recorded we used the mean GPS  
117 error for that individual.

118 We explored seasonal changes in motion variance and how it was impacted by an individual's proximity  
119 to landscape features (i.e., forest, roads, semi-natural areas, settlements, and water bodies). Due to serial  
120 autocorrelation and over dispersal in motion variance and distance raster values, we used non-metric  
121 multidimensional scaling (NMDS) to explore interactions among these variables. Using the *vegan*  
122 package (v.2.5.5 Oksanen et al. 2019), we ran NMDS on a distance matrix created from the rasters that  
123 described distances from key landscape features (using 2000 iterations to produce two axes). We plotted  
124 the resulting two-dimensions and coloured points corresponding to the motion variance values. The  
125 resulting visualisation allowed us to identify areas of high or low motion variance and the manner in  
126 which they are associated with snakes' distances to landscape features.

## 127 **Site fidelity and reuse**

128 Shelter sites are important for species requiring extended periods of low mobility to digest meals (Siers  
129 et al. 2018) or undergo ecdysis (Dodd and Barichivich 2007). Reptile studies often infer important areas  
130 using the 50% use ("core area") contour from a kernel density home range estimation. Use of a more  
131 intensive radio tracking regime allowed us to identify individual shelter sites, time spent within shelters,  
132 and frequency of reuse.

133 We identified site reuse with the *recurse* package (v.1.1.0 Bracis et al. 2018). We defined each site as  
134 a circular area with a radius equal to the mean GPS error recorded for each individual ( $\bar{x} = 5.1 \pm 0.8$  m,  
135 range = 3.5 – 10.0 m). When examining the frequency of revisits, we filtered out sites where the snake  
136 was present for less than the mean time between data points (9 hours). We determined whether a site  
137 was within the protected core area or the human-modified agricultural areas, then compared how  
138 frequency of site reuse and time spent at a shelter differed between these areas. We used Man-Whitney  
139 tests (we determined the data was non-normal with qq-plots) to compare differences at a population  
140 level.

141 Time spent at sites (residency time) and the reuse rate (*recurse*) have direct connections to the extent of  
142 animal space use, making them useful metrics to detect restrictions in movement (Van Moorter et al.  
143 2016). To examine these two metrics we ran four Bayesian models in JAGS using the *jagsUI* package  
144 (v.1.5.0 Kellner 2018). Two models used a log normal distribution to explore the impacts of proximity  
145 to uncorrelated landscape features on log transformed residency time (Bracis et al. 2018). Two models  
146 used a Poisson distribution to explore the impacts of proximity to uncorrelated landscape features on  
147 revisit counts (Bracis et al. 2018). We determined spatial correlation in the landscape rasters and created  
148 two groups of uncorrelated variables ( $r < 0.6$ ) to use as predictors: 1) roads, forest, and settlements; 2)  
149 roads, forest, and semi-natural areas.

150 Because of the variation between individuals, we used the individual ID as a random effect impacting  
151 both models' intercepts and gradients. We excluded AM007 from models because he remained in the  
152 forest; therefore, had little opportunity to display preference beyond forests or interact with landscape  
153 features.

154 We used Cauchy and half Cauchy distributions (Lemoine 2019) as hyperparameters for the centre and  
155 precision of normal distributions priors for individual random effects on distance to forest, semi-natural  
156 areas, roads, settlements and water. We selected weakly informative priors based on the assumption  
157 that King Cobras would follow similar movement patterns as those described in Tucker et al. (2018):  
158 reduced movement associated with anthropogenic features. We made the prior for the effect of distance  
159 to forest negative, reflecting the likely opposite effect from anthropogenic features proximity. We ran  
160 all models using three chains over 20,000 interactions, with the first 5,000 discarded as burn-in and a  
161 thinned factor of 50. Full JAGS models specifications can be found in at DOI:  
162 10.5281/zenodo.3666029.

163 We identified convergence via  $\hat{R}$  values and traceplots. We evaluated model performance using DIC,  
164 Bayes P-values, followed by visual inspection of posterior predictive check plots.

165 The *recurse* package also allowed us to quantify time spent in the protected core zone of the reserve.  
166 Comparing movements to a shapefile of the reserve's protected zone allowed us to create a summary

167 of all boundary crossings (entrance and exit times). From the revisit data, we calculated overall time  
168 spent in the core zone and plotted the use of the zone over time.

### 169 **Integrated Step-selection Function**

170 We explored King Cobra movements through the landscape with Integrated Step-Selection Functions  
171 (ISSF) from the *amt* package (v.0.0.6 Signer et al. 2018), using the same distance from landscape  
172 features rasters used in the above analyses. For ISSF, we inverted raster layers to guard against zero-  
173 inflation in distance values and make interpretation of resulting effects more intuitive. We used the  
174 landscape values at the endpoints in ISSF, because our sampling regime was temporally insufficient to  
175 assume straight-line movements between locations. We produced 200 random locations per step, with  
176 no resampling of data, because temporal resolution of our radio-tracking data was coarser than GPS  
177 data allowing high numbers of random steps without requiring prohibitively intense computation.  
178 Producing 200 random locations reduced the chance of missing rare landscape types, and made the best  
179 use of high-resolution raster data (Thurfjell et al. 2014).

180 All nine models included step length and angle (Forester et al. 2009), with random step lengths and  
181 angles drawn from gamma and von Mises distributions, respectively. One model only included step  
182 length and angle as predictors, five models included step length, angle and distance from a landscape  
183 feature, and three models included step length, angle and a combination of distances from multiple  
184 uncorrelated landscape features. We selected models per individual using Aikike's Information  
185 Criterion (AIC), discarding those with a  $\Delta AIC > 2$  (Burnham and Anderson 2010). We did not model  
186 average to produce a population level model, because we observed high individual heterogeneity. We  
187 excluded AM007 from the ISSF analysis, because he never left forested areas.

### 188 **Software and data**

189 We completed all analysis in R (v.3.5.3 R Core Team 2019) and R Studio (v.1.2.1335 R Studio Team  
190 2019). The full dataset, with code scripts, can be found at DOI: 10.5281/zenodo.3666029. Movement  
191 data is also available on MoveBank (Movebank ID: 1093796277).

192 For data manipulation, we used R packages *broom* (v.0.5.2 Robinson and Hayes 2019), *data.table*  
193 (v.1.12.2 Dowle and Srinivasan 2019), *dplyr* (v.0.8.3 Wickham et al. 2019), *forcats* (v.0.4.0 Wickham  
194 2019a), *lubridate* (v.1.7.4 Grolemund and Wickham 2011), *openxlsx* (v.4.1.0 Walker 2018), *readr*  
195 (v.1.3.1 Wickham et al. 2018), *reshape2* (v.1.4.3 Wickham 2007), and *stringr* (v.1.4.0 Wickham  
196 2019b). We handled rasters and shapefiles with R packages *raster* (v.2.8.19 Hijmans 2019), *rgdal*  
197 (v.1.4.3 Bivand et al. 2019) and *sp* (v.1.3.1 Pebesma and Bivand 2005, Bivand et al. 2013). For  
198 visualisations we used R packages *cowplot* (v.0.9.4 Wilke 2019), *ggplot2* (v.3.2.1 Wickham 2009),  
199 *ggpubr* (v.0.2 Kassambara 2018), *ggspatial* (v.1.0.3 Dunnington 2018), *scales* (v.1.1.0 Wickham and

200 Seidel 2019) and *scico* (v.1.1.0 Pedersen and Cramer 2018). To determine model convergence and  
 201 evaluate model performance, we used the R packages *ggmcmc* (v.1.2 Fernández-i-Marín 2016),  
 202 *ggridges* (v.0.5.1 Wilke 2018), and *tidybayes* (v.1.0.4 Kay 2019).

## 203 Results

204 We tracked seven King Cobras for an average of  $649.7 \pm 112.3$  days (Table 1; all  $\pm$  indicated the standard  
 205 error [SE] associated with the  $\bar{x}$ , calculated using the *pracma* package (v.2.2.5 Borchers 2019)) enabling  
 206 us to use dynamic Brownian Bridge Movement Model analysis and explore impacts of land-use on  
 207 movement. We tracked and located each King Cobra an average of  $1834 \pm 297.1$  times, with an average  
 208 of  $8.5 \pm 0.1$  hours between fixes (range = 0.1 – 793.9 hours; Supplementary Figure 1). King Cobras  
 209 occupied an average of  $524 \pm 104.5$  unique locations, covering large areas in protected and unprotected  
 210 areas (Table 1; Figure 1), with adult males tending to move more. The two juvenile males differed  
 211 greatly from each other, likely the result of JM013’s northward travel. We only radio tracked a single  
 212 adult female, which used the smallest area of any snake.

213 **Table 1. Summary of tracking and movements.** Datapoints = number of datapoints collected on an individual irrespective  
 214 of move or not. Relocations = number of unique locations visited by an individual. Days = number of days tracked. Revisits  
 215 frequency = the number of days between revisits to a previously used location (days tracked / count of reused locations). Time  
 216 stationary = mean sheltering time  $\pm$ SE in days. dBBMM Range = range areas estimated using dBBMM 99%, 95%, and 90%  
 217 contours.  $\sigma^2m$  = mean motion variance  $\pm$ SE. % Outside of PA = Percentage of total time tracked an individual was outside of  
 218 the protected area.

| ID    | Datapoints | Days    | Relocations | Revisit<br>frequency | Time<br>stationary | dBBMM Range (ha) |        |         | $\sigma^2m$      | % outside<br>PA |
|-------|------------|---------|-------------|----------------------|--------------------|------------------|--------|---------|------------------|-----------------|
|       |            |         |             |                      |                    | 90               | 95     | 99      |                  |                 |
| AF017 | 2245       | 774.97  | 728         | 3.19                 | $1.84 \pm 0.13$    | 41.69            | 68.15  | 149.28  | $7.53 \pm 0.33$  | 91.53           |
| AM006 | 2173       | 723.05  | 542         | 19.03                | $2.58 \pm 0.27$    | 519.60           | 701.44 | 1063.42 | $42.61 \pm 1.74$ | 15.49           |
| AM007 | 969        | 320.66  | 220         | 12.83                | $2.61 \pm 0.53$    | 232.70           | 345.62 | 616.90  | $51.90 \pm 3.81$ | 0.67            |
| AM015 | 1944       | 680.13  | 587         | 13.60                | $2.24 \pm 0.22$    | 379.80           | 603.32 | 1081.54 | $27.3 \pm 1.22$  | 67.57           |
| AM018 | 3122       | 1176.10 | 985         | 7.79                 | $2.16 \pm 0.14$    | 255.09           | 492.54 | 977.84  | $33.56 \pm 1.41$ | 42.39           |
| JM013 | 1497       | 561.19  | 381         | 21.58                | $3.09 \pm 0.39$    | 354.33           | 533.26 | 972.74  | $22.35 \pm 1.11$ | 99.95           |
| JM019 | 890        | 311.79  | 228         | 11.99                | $2.56 \pm 0.37$    | 61.01            | 119.04 | 390.39  | $7.90 \pm 0.63$  | –               |

219

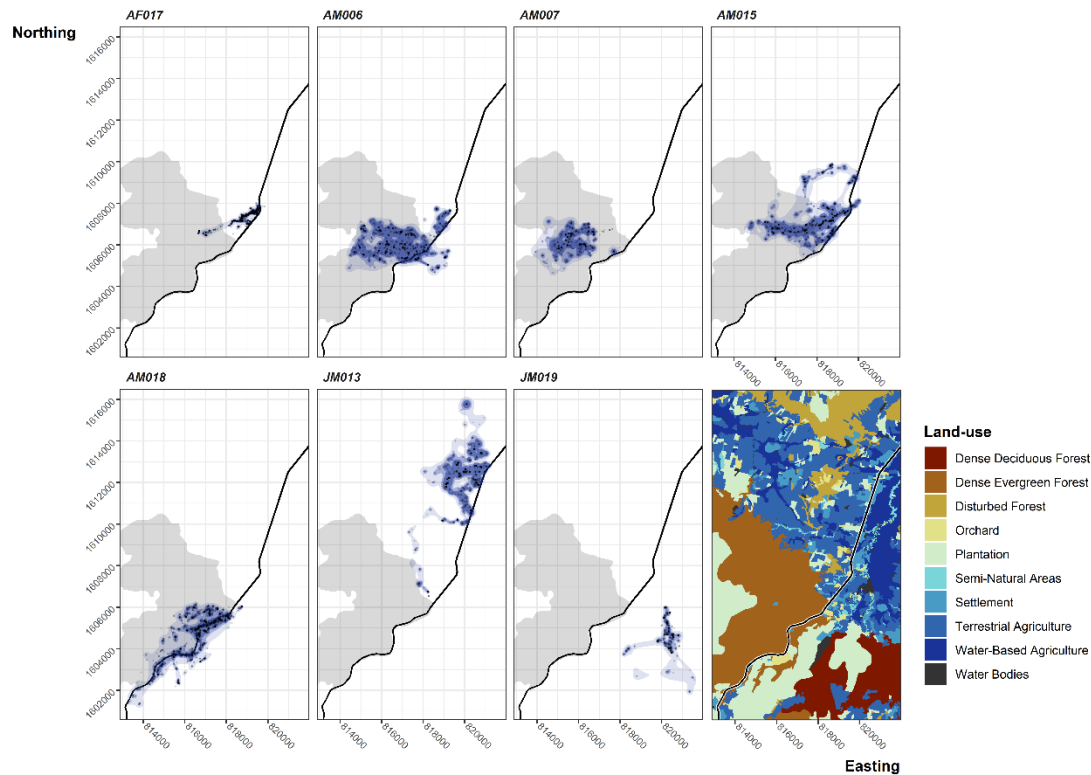

220

221 **Figure 1. Dynamic Brownian Bridge Movement Model estimates of utilisation distribution contours.** Areas displayed  
222 with increasing levels of opacity are the 99%, 95% and 90% utilisation contours. Black dots show locations. The shaded  
223 background area shows the protected core area. Dark central line is the four-lane 304 highway. Bottom right map shows the  
224 land-use types in the area.

225 Our examination of seasonality using *segclust2D* suggested that five clusters and 23 segments was the  
226 best way of dividing the 2012-2018 period into seasons. However, it resulted in seasons unique to single  
227 years. Therefore, we manually simplified the seasons into three groups that appear in nearly all years:  
228 hot ( $\bar{x} = 33.8 \pm 2.8$  °C,  $\bar{x} = 2.5 \pm 7.9$  mm rainfall), wet ( $\bar{x} = 29.9 \pm 2.2$  °C,  $\bar{x} = 5.9 \pm 11.1$  mm rainfall) and  
229 dry ( $\bar{x} = 29.0 \pm 3.5$  °C,  $\bar{x} = 0.2 \pm 0.8$  mm rainfall).

230 Time spent in human disturbed areas varied dramatically between individuals and showed modest  
231 seasonal patterns ( $\bar{x} = 59.7 \pm 15.5\%$ , range = 0.7 – 100%; Table 1, Figure 2). During the start of the hot  
232 season (Figure 2 red highlight, February-April), adult males ventured out of protected forested areas, a  
233 pattern particularly clear in AM006's movements. During other times of the year, snakes exhibited more  
234 consistent use of the protected area, which coincided with more frequent long-term use of shelter sites  
235 (Figure 2). The female, AM017, showed a consistent yearly pattern of entering the protected area via a  
236 semi-natural area corridor that connected to a streambed.



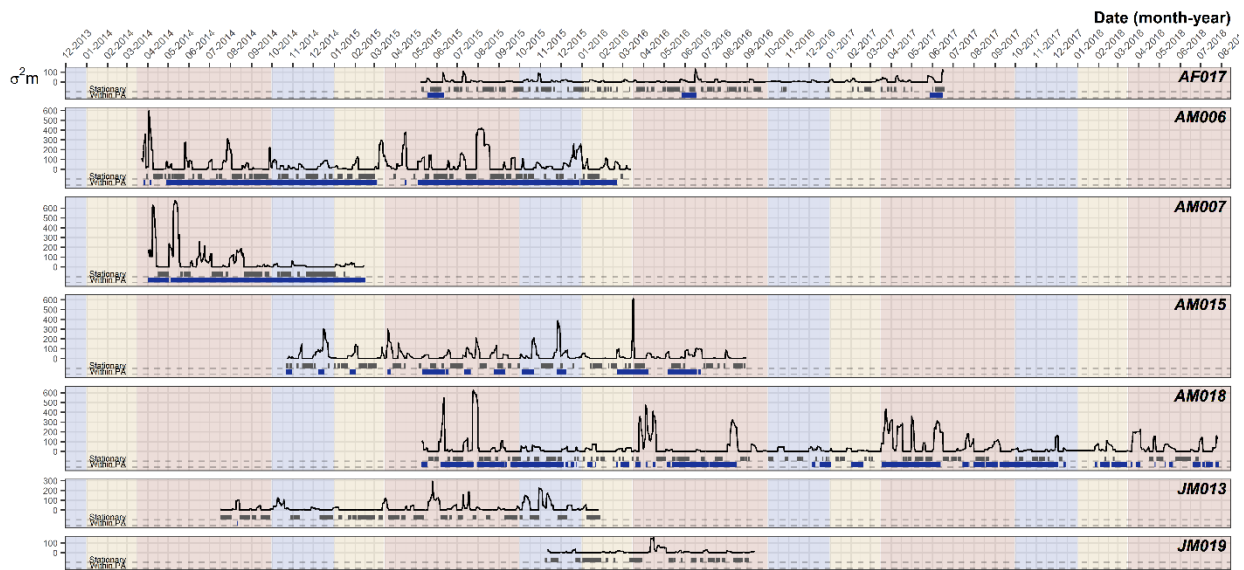

237

238 **Figure 2. Motion variance of each individual over their tracking period.** Black lines show the motion variance values over  
239 time. Grey bars indicate long-term sheltering behaviour (i.e., when the time sheltering was greater than the individual's mean  
240 sheltering time). Blue bars indicate times when the individual was within the protected forested area. Shading shows the three  
241 seasons: red = Hot, blue = Wet, yellow = Dry.

## 242 Motion variance

243 Mean motion variance differed among individuals ( $\bar{x} = 27.9 \pm 0.6$  m, range =  $5.6e^{-05} - 675.8$  m, Table  
244 1). The largest motion variances belonged to adult males, characterized by larger movements  
245 concentrated at the beginning of the hot season (Figure 2, red highlight). Juvenile males did not move  
246 as far as adult males at any time of the year, but they did appear to be more active than the female,  
247 AF017. Motion variance of AF017 peaked during the hot season, when she entered the protected area  
248 in mid- to late-April and left in mid-May. All individuals displayed seasonal differences in motion  
249 variance, with the lowest values during the dry season ( $\bar{x} = 34.9 \pm 1.0$   $\sigma^2$ m) compared to hot ( $\bar{x} = 22.1$   
250  $\pm 0.8$   $\sigma^2$ m) and wet seasons ( $\bar{x} = 14.0 \pm 0.7$   $\sigma^2$ m; Figure 2).

251 Motion variance was highest in evergreen and disturbed forests ( $\bar{x} = 38.9 \pm 1.1$ , max = 665 m;  $\bar{x} = 48.3$   
252  $\pm 4.8$ , max = 598 m), and lowest in orchards ( $\bar{x} = 10.5 \pm 1.24$  m, max = 449), semi-natural areas ( $\bar{x} =$   
253  $11.6 \pm 0.6$ , max = 347 m), and water bodies ( $\bar{x} = 10.3 \pm 1.4$ , max = 119 m).

254 Using NMDS, we successfully reduced dimensionality of chosen landscape features, revealing several  
255 patterns. The clearest pattern was the grouping of higher motion variance values, the majority of which  
256 arose when snakes were < 100 m from forested areas (Figure 3; see Supplementary Figure 2 for bi-  
257 plot). In contrast to movement variance values near or within forests, NMDS revealed consistently  
258 lower values within 100 m of semi-natural areas. All other covariates were more weakly associated with  
259 particular motion variance values. Roads contained a wide array of values, which overlapped with forest  
260 and semi-natural areas, suggesting a weaker impact on motion variance. Settlements and water bodies

261 revealed similarly weak associations to motion variance, but there was a tendency for motion variance  
262 near or within settlements to be lower than those near or within forests.

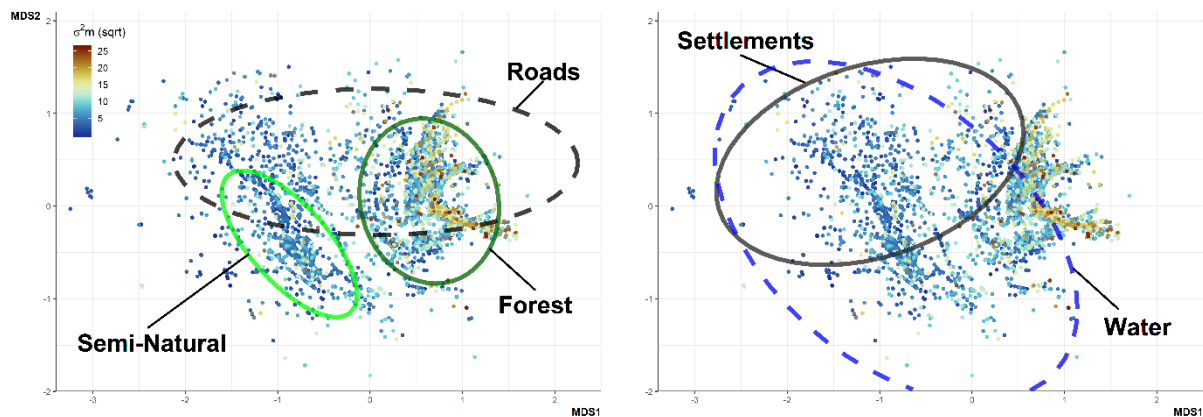

263  
264 **Figure 3. Non-metric multidimensional scaling plot.** Motion variance values are reflected by the colour of the points, we  
265 have rooted these values so value differences are easier to distinguish. Ellipses indicate 95% of points within 100 m of a given  
266 landscape feature. A) Ellipses highlight points existing within 100 m of forest, semi-natural areas, and roads. B) Ellipses  
267 highlights points existing within 100 m of water, and settlements.

### 268 **Site fidelity and reuse**

269 The *recurse* analysis revealed that mean time spent at a shelter site (stationary for more than 9 hours)  
270 was  $2.3 \pm 0.1$  days (range = 0.4 – 43.5 days; Supplementary Figure 3), and all snakes demonstrated site  
271 fidelity, revisiting a previously used site on average every  $13.0 \pm 2.4$  days (range = 3.2 – 21.6 days;  
272 Table 1).

273 Mann-Whitney U tests at a population level failed to detect significant differences in frequency of site  
274 reuse between sites in core forest (median = 190.4) and anthropogenic areas (median = 99.1;  $W = 13027$ ,  
275  $n_1 = 99$ ,  $n_2 = 250$ ,  $p$ -value = 0.4432 two-sided; Supplementary Figure 4). Similarly, time spent within  
276 sites was not significantly different between core forest (median = 24.7) and anthropogenic areas  
277 (median = 24.8;  $W = 210410$ ,  $n_1 = 398$ ,  $n_2 = 1095$ ,  $p$ -value = 0.3087 two-sided; Supplementary Figure  
278 5).

279 All models we ran to predict residency time and revisits converged and produced Bayes  $p$ -values close  
280 to 0.5. All the models revealed that the distance to landscape features has a negligible effect on residency  
281 time or revisit frequency, illustrated by all  $\beta$  coefficient 95% credible intervals values overlapping with  
282 zero. Results of all Bayesian models can be found in Supplementary Table 1.

### 283 **Integrated Step-selection Function**

284 Individual movements of the King Cobras were best described by three models (Figure 4; Table 2; full  
285 ISSF results can be found in Supplementary Table 2). Model 7 performed best for four individuals, and

286 included proximity to forest, roads, and semi-natural areas. Universally, the locations of AF017,  
 287 AM015, AM018 and JM019 were positively associated with forests. However, the association between  
 288 movements, roads, and semi-natural areas varied; AF017, AM015 and JM019 preferred semi-natural  
 289 areas, but were inconsistently associated with roads. The movements of AM006, AM015, and AF017  
 290 while in agricultural land exemplifies King Cobras' reliance on semi-natural areas (Figure 5). By  
 291 contrast, AM018's locations were associated with roads, while weakly avoiding semi-natural areas. But  
 292 for AM018 model 8 was within 2  $\Delta$  AIC. Model 8 replaced semi-natural areas with settlements as a  
 293 predictor, indicating positive association ( $\beta = 2.504$ , 95% CI -0.244 – 5.253). Models targeting JM013's  
 294 movements were similarly inconclusive, with four models achieving  $\Delta$  AIC < 2 (including the null  
 295 model), indicating distance to landscape feature was a poor predictor of movement. Finally, AM006's  
 296 movements were best described by model 6, indicating a weak association with water bodies.

297 **Table 2. ISSF model formulation and AIC results.** sl = step length; ta = turning angle; dist\_\* = distance from forest,  
 298 settlement, semi-natural area, road, and water. \* and bold indicate the models < 2  $\Delta$  AIC from the top-performing model.

| Model  | Model formula, all begin with Model1 formulation            | AF017           | AM006           | AM015           | AM018            | JM013           | JM019           |
|--------|-------------------------------------------------------------|-----------------|-----------------|-----------------|------------------|-----------------|-----------------|
| Model1 | log_sl*cos_ta+strata(step_id_)                              | 7573.47         | 5794.50         | 6205.87         | 10567.77         | <b>4014.21*</b> | 2402.41         |
| Model2 | Model1+dist_forest+dist_forest:log_sl+dist_forest:cos_ta    | 7555.47         | 5794.62         | 6187.03         | 10530.19         | <b>4013.58*</b> | 2399.25         |
| Model3 | Model1+dist_settle+dist_settle:log_sl+dist_settle:cos_ta    | 7542.05         | 5794.64         | 6201.81         | 10552.30         | <b>4014.60*</b> | 2402.45         |
| Model4 | Model1+dist_semiNat+dist_semiNat:log_sl+dist_semiNat:cos_ta | 7492.52         | 5783.74         | 6186.73         | 10563.71         | 4017.76         | 2392.32         |
| Model5 | Model1+dist_road+dist_road:log_sl+dist_road:cos_ta          | 7557.50         | 5791.24         | 6201.98         | 10498.78         | 4017.31         | 2406.31         |
| Model6 | Model1+dist_water+dist_water:log_sl+dist_water:cos_ta       | 7566.34         | <b>5779.88*</b> | 6199.01         | 10559.55         | <b>4013.23*</b> | 2404.11         |
| Model7 | Model1+dist_road+dist_forest+dist_semiNat                   | <b>7471.48*</b> | 5789.37         | <b>6171.16*</b> | <b>10471.26*</b> | 4017.55         | <b>2388.28*</b> |
| Model8 | Model1+dist_road+dist_forest+dist_settle                    | 7539.43         | 5789.9          | 6195.03         | <b>10472.37*</b> | 4017.61         | 2400.04         |
| Model9 | Model1+dist_road+dist_forest+dist_water                     | 7530.33         | 5789.75         | 6187.41         | 10474.02         | 4015.71         | 2398.12         |

299

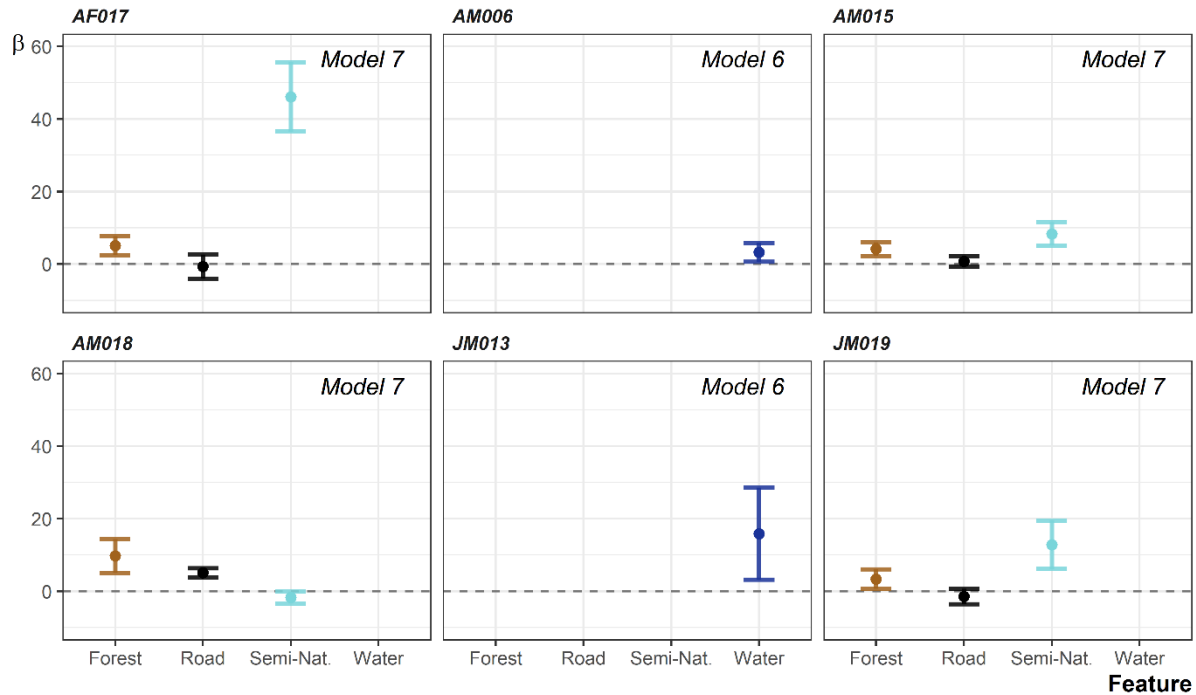

300  
 301 **Figure 4. The coefficients from the best performing integrated step-selection functions per individual.** Error bars show  
 302 the 95% confidence interval. JM013 and AM018's had other models within 2  $\Delta$  AIC.

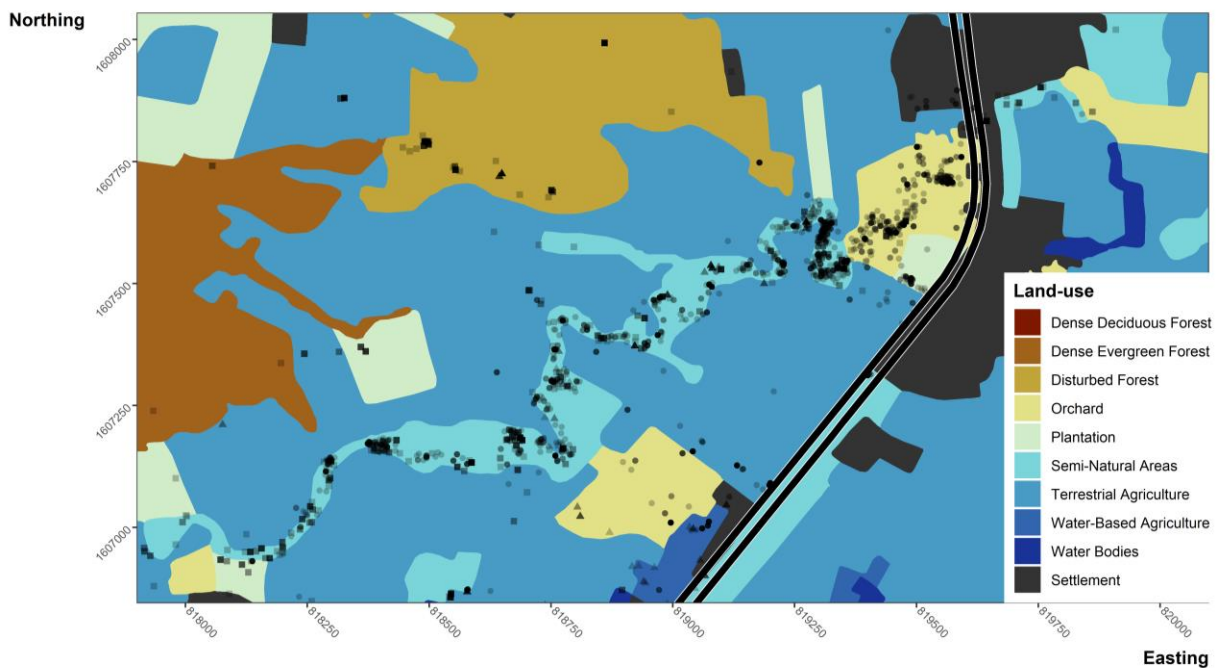

303  
 304 **Figure 5. A map of land-use illustrating how King Cobra movements are largely occurring within semi-natural areas.**  
 305 Displayed using semi-transparent points, are the locations of King Cobras across the entire study period. Circles = AF017,  
 306 triangles = AM006, squares = AM015.

## 307 Discussion

308 We present some of the first evidence for how a large tropical reptile modifies its movements when in  
 309 agricultural areas. Motion variance was characterized by seasonal peaks associated with breeding

310 activity, but generally showed decreased activity in agricultural areas. Reduced movement in  
311 anthropogenic systems reflects meta-analyses of mammalian movements in anthropogenic systems  
312 (Tucker et al. 2018). Research on reptile spatial ecology has documented either reduced space-use  
313 (Mitrovich et al. 2009, Hoss et al. 2010, Breininger et al. 2011, Lomas et al. 2019) or reduced movement  
314 (Parent and Weatherhead 2000, Corey and Doody 2010, Beale et al. 2016, Doherty et al. 2019) in  
315 fragmented agricultural landscapes. But the response to fragmentation is not universal, other research  
316 failed to detect significant shifts in movement patterns (Row et al. 2012, Wolf et al. 2013, Anguiano  
317 and Diffendorfer 2015), or even revealed increased space-use in fragmented areas (Kapfer et al. 2010,  
318 Ettling et al. 2013), potentially due to species-specific evolutionary history traits (Fahrig 2007). King  
319 Cobras appeared to be reacting in a way consistent with forest specialists, or taxa that have evolved in  
320 continuous habitat (Fahrig 2007) –limited boundary avoidance, large movements, and mortality in  
321 human-dominated areas (Marshall et al. 2018). Landscape-specialist species occupying fragmented  
322 areas likely face limited resources, resulting in restricted movements to more naturalistic corridors  
323 (Dondina et al. 2019).

324 The clearest pattern we documented was preferential use of semi-natural vegetation patches when King  
325 Cobras moved within agricultural areas. These patches primarily consist of dense vegetation arrayed  
326 linearly along the banks of irrigation canals, and are used more frequently than the surrounding matrix  
327 of agricultural fields, acting as movement corridors through the fragmented landscape. Linear habitats  
328 potentially impact movements in other reptile species (Kay et al. 2016, Doherty et al. 2019). Doherty  
329 et al. (2019) suggested that reduced movement by Eastern Bearded Dragons (*Pogona barbata*) was  
330 partly driven by higher prey availability in linear vegetation patches. Although we lack direct evidence  
331 suggesting semi-natural areas within agricultural landscapes host relatively higher prey abundance, it is  
332 likely King Cobra prey can be found more frequently where vegetation and water are present (Murphy  
333 et al. 1999, Barnes et al. 2017, Strine et al. 2018). However, increased movements in forests, at least  
334 for some individuals, may indicate that resource availability alone fails to explain variation in  
335 movement patterns. Intact forests are extremely valuable and present a resource-rich environment,  
336 theoretically reducing the need for foraging movements (Wasko and Sasa 2012, Doherty and Driscoll  
337 2018).

338 Ectotherms also have to consider the thermal qualities of habitats, shifting habitat usage to maximise  
339 efficiency (Blouin-Demers and Weatherhead 2001, 2002). Compared to temperate regions, evidence  
340 from the tropics that behavioural shifts are required to maximise thermoregulation is more ambiguous  
341 (Luiselli and Akani 2002), but not unknown in larger species (Shine and Madsen 1996). Open fields  
342 and vegetation corridors present two contrasting thermal environments. When temperatures are high  
343 tropical snakes may need to seek cooler, covered, and environments potentially richer in shelter sites.

344 Utilisation of covered areas may also be tied to threat avoidance, as threats are known to influence  
345 animal movement (Rio-Maior et al. 2019, Suraci et al. 2019). In our study area, roads pose a major  
346 threat to many animals (Silva et al. 2020a). King Cobras also fall victim to both direct (Marshall et al.  
347 2018) and indirect (Strine et al. 2014) human-caused mortality. However, we failed to detect clear  
348 avoidance of roads or human settlements; King Cobras made use of suitable habitat types regardless of  
349 their proximity to threatening landscape features. Similarly, patterns of site reuse remained consistent  
350 in respect to proximity to landscape features. This suggests that the overarching driver of site residency  
351 time and revisitation is largely independent of habitat, instead likely connected to cycles of ecdysis and  
352 prey capture and digestion (Dodd and Barichivich 2007, Siers et al. 2018).

353 Building on our results, we suggest that future conservation research focus on landscape connectivity.  
354 Irrigation canals and forest fragments may allow King Cobras to persist across areas largely separated  
355 from protected forest. Research on landscape connectivity could be especially beneficial if paired with  
356 an assessment of how threats can be effectively mitigated. The apparent lack of threat avoidance  
357 illustrated by the studied King Cobras demands changes in human behaviour. For example, road  
358 crossing structures in combination with fencing would likely help to mitigate the threat posed by roads  
359 (Rytwinski et al. 2016). Whereas reducing persecution of King Cobras will require a change in current  
360 negative perceptions (Shankar et al. 2013, Marshall et al. 2018) and improvements in humane snake  
361 removal services, although the cost-effectiveness of snake removal services needs further quantification  
362 (Devan-Song et al. 2016).

## 363 **Conclusion**

364 Our results indicate that limited areas in agricultural landscapes are suitable for King Cobras, resulting  
365 in reduced movements that largely occur within vegetated patches along irrigation canals. Apparent  
366 reliance on vegetated patches, in an otherwise hostile human-dominated matrix, mirror findings that  
367 landscape heterogeneity and the presence of semi-natural vegetated features are required to maintain  
368 reptile diversity (Nopper et al. 2017, Pulsford et al. 2017, Boesing et al. 2018). The vulnerability of  
369 King Cobras in agricultural areas suggests that these areas may be acting as a population sink (Driscoll  
370 et al. 2013, Marshall et al. 2018), which emphasises the importance of maintaining vegetated areas  
371 within the landscape matrix to provide refuge from known mortality sources. Future research will assess  
372 spatial composition of resources available to King Cobras, and whether reduced movement leads to  
373 additional sub-lethal costs. More broadly, our findings suggest that wide-ranging reptiles can react to  
374 landscape fragmentation in similar ways to terrestrial mammals. This is especially important, because  
375 large snakes, such as King Cobras, fulfil underappreciated ecosystem roles (Miranda 2017). Their role  
376 in top-down trophic structuring is likely comparable to mammals that typically receive more  
377 conservation attention.

378

379 **Declarations**

380 **Acknowledgements**

381 We thank Nakhon Ratchasima Zoo, Dusit Zoo, and Zoological Park Organization under the Royal  
382 Patronage of His Majesty the King, Thailand; along with Wirongrong Changphet, Doctor of Veterinary  
383 Medicine (DVM); Wanlaya Tipkantha, DVM for their expertise in undertaking surgery on protected  
384 species. We thank the National Park, Wildlife and Plant Conservation Department, Thailand for  
385 supplying permits to study King Cobras. We thank the National Research Council of Thailand for  
386 providing permits for the project. We thank the Suranaree University of Technology and the School of  
387 Biology for supervising and funding the project, providing ethical approval, and general logistics. We  
388 thank Pluemjit Boonpueng for assisting with paperwork and logistics. We thank Assistant Professor Dr.  
389 Pantip Piyatadsananon, Vice director of Lower Northeast Regional Center of Geoinformatics and Space  
390 Technology Development Agency for obtaining land use data. We thank the Institute of Animals  
391 Scientific Purpose Development for supplying animal use licenses to C.T.S. and P.S. We thank Wildlife  
392 Reserves Singapore Conservation Fund, National Scientific and Technological Development Agency,  
393 and Herpetofauna Foundation for supplying funding and equipment. We thank the Thailand Institute of  
394 Scientific and Technological Research and Sakaerat Environmental Research Station for the consistent  
395 and crucial logistical support throughout the project. We thank the residents of Udom Sab for allowing  
396 research to be undertaken across their land. We thank the Hook 31 Rescue teams for their tireless work  
397 mitigating human-snake conflict and providing us with a number of King Cobras. We thank numerous  
398 Sakaerat Conservation and Snake Education Team members for countless hours tracking King Cobras  
399 throughout the landscape.

400 **Funding**

401 National Science and Technological Development Agency, Thailand; Wildlife Reserves Singapore;  
402 Herpetofauna Foundation; Suranaree University of Technology.

403 **Availability of data and materials**

404 Data used in this study is available on Zenodo (DOI: 10.5281/zenodo.3666029) and Movebank  
405 (Movebank ID: 1093796277). The Zenodo repository also includes all R scripts used to run analysis  
406 and generate figures.

407 **Author contributions**

408 *Conceptualization*, I.S., M.C., and C.T.S.; *Methodology*, I.S., M.C., C.T.S., and B.M.M.; *Formal*  
409 *Analysis*, B.M.M., M.C., and I.S.; *Investigation*, C.T.S., I.S., M.C., M.D.J., C.W.H. and B.M.M.;  
410 *Resources*, M.G., P.S., T.A., and S.W.; *Writing – Original Draft*, B.M.M., M.C., I.S., M.D.J., and  
411 C.T.S.; *Writing – Review & Editing*, B.M.M., M.C., I.S., M.D.J., C.W.H., C.T.S., and M.G.;

412 *Visualisation*, B.M.M.; *Supervision*, P.S., S.W., and T.A.; *Funding Acquisition*, M.D.J., C.T.S., and  
413 P.S.

#### 414 **Competing interest**

415 We declare that there are no conflicts of interest.

#### 416 **Ethics approval and consent to participate**

417 We had ethical approval from the Suranaree University of Technology Ethics Committee (24/2560).  
418 All work was undertaken Institute of Animals for Scientific Purpose Development (IAD) licenses  
419 belonging to P.S. and C.T.S. All work was permitted by the National Park, Wildlife and Plant  
420 Conservation Department, Thailand and the National Research Council of Thailand (98/59). All work  
421 was undertaken with permission from Thailand Institute of Scientific and Technological Research and  
422 Sakaerat Environmental Research Station.

#### 423 **References**

- 424 Anguiano, M. P. and Diffendorfer, J. E. 2015. Effects of fragmentation on the spatial ecology of the  
425 California kingsnake (*Lampropeltis californiae*). - *Journal of Herpetology* 49: 420–427.
- 426 Arrondo, E. et al. 2018. Invisible barriers: Differential sanitary regulations constrain vulture  
427 movements across country borders. - *Biological Conservation* 219: 46–52.
- 428 Barnes, C. H. et al. 2017. Movement and home range of green pit vipers (*Trimeresurus* spp.) in a rural  
429 landscape in north-east Thailand. - *Herpetological Bulletin* 142: 19–28.
- 430 Beale, M. et al. 2016. Anthropogenic Disturbance Affects Movement and Increases Concealment in  
431 Western Diamondback Rattlesnakes (*Crotalus atrox*). - *Journal of Herpetology* 50: 216–221.
- 432 Bivand, R. and Rundel, C. 2018. rgeos: Interface to geometry engine - open source ('GEOS').
- 433 Bivand, R. S. et al. 2013. Applied spatial data analysis with R, Second edition. - Springer, NY.
- 434 Bivand, R. et al. 2019. rgdal: Bindings for the “geospatial” data abstraction library.
- 435 Blouin-Demers, G. and Weatherhead, P. J. 2001. Habitat use by black rat snakes (*Elaphe obsoleta*  
436 *obsoleta*) in fragmented forests. - *Ecology* 82: 2882–2896.
- 437 Blouin-Demers, G. and Weatherhead, P. J. 2002. Habitat-specific behavioural thermoregulation by  
438 black rat snakes (*Elaphe obsoleta obsoleta*). - *Oikos* 97: 59–68.
- 439 Boesing, A. L. et al. 2018. Biodiversity extinction thresholds are modulated by matrix type. -  
440 *Ecography* 41: 1520–1533.
- 441 Böhm, M. et al. 2016. Correlates of extinction risk in squamate reptiles: The relative importance of  
442 biology, geography, threat and range size. - *Global Ecology and Biogeography* 25: 391–405.
- 443 Borchers, H. W. 2019. pracma: Practical numerical math functions.



- 444 Bracis, C. et al. 2018. Revisitation analysis uncovers spatio-temporal patterns in animal movement  
445 data. - *Ecography* in press.
- 446 Breininger, D. R. et al. 2011. Factors Influencing Home-Range Sizes of Eastern Indigo Snakes in  
447 Central Florida. - *Journal of Herpetology* 45: 484–490.
- 448 Burnham, K. P. and Anderson, D. R. 2010. Model selection and multimodel inference: a practical  
449 information-theoretic approach. - Springer.
- 450 Calenge, C. 2006. The package adehabitat for the R software: a tool for the analysis of space and  
451 habitat use by animals. - *Ecological Modelling* 197: 516–519.
- 452 Cardillo, M. 2005. Multiple Causes of High Extinction Risk in Large Mammal Species. - *Science* 309:  
453 1239–1241.
- 454 Clark, R. W. et al. 2011. Decline of an isolated timber rattlesnake (*Crotalus horridus*) population:  
455 Interactions between climate change, disease, and loss of genetic diversity. - *Biological*  
456 *Conservation* 144: 886–891.
- 457 Corey, B. and Doody, J. S. 2010. Anthropogenic influences on the spatial ecology of a semi-arid  
458 python. - *Journal of Zoology* 281: 293–302.
- 459 Cottontail, V. M. et al. 2009. Habitat fragmentation and haemoparasites in the common fruit bat,  
460 *Artibeus jamaicensis* (Phyllostomidae) in a tropical lowland forest in Panamá. - *Parasitology*  
461 136: 1133–1145.
- 462 Courbin, N. et al. 2016. Reactive responses of zebras to lion encounters shape their predator-prey  
463 space game at large scale. - *Oikos* 125: 829–838.
- 464 De Solla, S. R. et al. 1999. Eliminating autocorrelation reduces biological relevance of home range  
465 estimates. - *Journal of Animal Ecology* 68: 221–234.
- 466 Devan-Song, A. et al. 2016. Is long-distance translocation an effective mitigation tool for white-lipped  
467 pit vipers (*Trimeresurus albolabris*) in South China? - *Biological Conservation* 204: 212–220.
- 468 Dodd, C. K. and Barichivich, W. 2007. Movements of large snakes (*Drymarchon, masticophis*) in  
469 north-central Florida. - *Florida Scientist* 70: 83–94.
- 470 Doherty, T. S. and Driscoll, D. A. 2018. Coupling movement and landscape ecology for animal  
471 conservation in production landscapes. - *Proc. R. Soc. B* 285: 20172272.
- 472 Doherty, T. S. et al. 2019. Animal movement varies with resource availability, landscape  
473 configuration and body size: a conceptual model and empirical example. - *Landscape Ecol*  
474 34: 603–614.
- 475 Dondina, O. et al. 2019. Species specialization limits movement ability and shapes ecological  
476 networks: the case study of 2 forest mammals (G Wang, Ed.). - *Current Zoology* 65: 1–13.
- 477 Dowle, M. and Srinivasan, A. 2019. data.table: Extension of `data.frame`.
- 478 Driscoll, D. A. et al. 2013. Conceptual domain of the matrix in fragmented landscapes. - *Trends in*  
479 *Ecology & Evolution* 28: 605–613.
- 480 Dunnington, D. 2018. ggspatial: Spatial data framework for ggplot2.

- 481 Ettlign, J. A. et al. 2013. Spatial Ecology of Armenian Vipers, *Montivipera raddei*, in a Human-  
482 Modified Landscape. - Copeia 2013: 64–71.
- 483 Fahrig, L. 2007. Non-optimal animal movement in human-altered landscapes. - Functional Ecology  
484 21: 1003–1015.
- 485 Fernández-i-Marín, X. 2016. ggcmc: Analysis of MCMC Samples and Bayesian Inference. - Journal  
486 of Statistical Software 70: 1–20.
- 487 Fieberg, J. 2007. Kernel density estimators of home range: Smoothing and the autocorrelation red  
488 herring. - Ecology 88: 1059–1066.
- 489 Forester, J. D. et al. 2009. Accounting for animal movement in estimation of resource selection  
490 functions: sampling and data analysis. - Ecology 90: 3554–3565.
- 491 Fraser, K. C. et al. 2018. Tracking the conservation promise of movement ecology. - Frontiers in  
492 Ecology and Evolution 6: 150.
- 493 Gaynor, K. M. et al. 2018. The influence of human disturbance on wildlife nocturnality. - Science  
494 360: 1232–1235.
- 495 Golemund, G. and Wickham, H. 2011. Dates and Times Made Easy with {lubridate}. - Journal of  
496 Statistical Software 40: 1–25.
- 497 Hijmans, R. J. 2019. raster: Geographic data analysis and modeling.
- 498 Horne, J. S. et al. 2007. Analyzing animal movements using Brownian bridges. - Ecology 88: 2354–  
499 2363.
- 500 Hoss, S. K. et al. 2010. Multiscale Influences of Landscape Composition and Configuration on the  
501 Spatial Ecology of Eastern Diamond-backed Rattlesnakes (*Crotalus adamanteus*). - Journal of  
502 Herpetology 44: 110–123.
- 503 Jellen, B. C. et al. 2007. Male Movement and Body Size Affect Mate Acquisition in the Eastern  
504 Massasauga (*Sistrurus catenatus*). - Journal of Herpetology 41: 451–457.
- 505 Kamath, A. and Losos, J. B. 2018. Estimating encounter rates as the first step of sexual selection in  
506 the lizard *Anolis sagrei*. - Proceedings of the Royal Society B: Biological Sciences 285:  
507 20172244.
- 508 Kapfer, J. M. et al. 2010. Modeling the relationship between habitat preferences and home-range size:  
509 A case study on a large mobile colubrid snake from North America. - Journal of Zoology 282:  
510 13–20.
- 511 Karraker, N. E. et al. 2018. Signals of forest degradation in the demography of common Asian  
512 amphibians. - PeerJ 6: e4220.
- 513 Kassambara, A. 2018. ggpubr: “ggplot2” based publication ready plots.
- 514 Kay, M. 2019. tidybayes: Tidy Data and Geoms for Bayesian Models.
- 515 Kay, G. M. et al. 2016. Pasture height and crop direction influence reptile movement in an agricultural  
516 matrix. - Agriculture, Ecosystems & Environment 235: 164–171.
- 517 Kellner, K. 2018. jagsUI: A Wrapper Around “rjags” to Streamline “JAGS” Analyses.

- 518 Kranstauber, B. et al. 2012. A dynamic Brownian bridge movement model to estimate utilization  
519 distributions for heterogeneous animal movement. - *Journal of Animal Ecology* 81: 738–746.
- 520 Kranstauber, B. et al. 2016. Package ‘move’.
- 521 Land Development Department, Thailand 2017. Land-use data of Thailand. in press.
- 522 Lemoine, N. P. 2019. Moving beyond noninformative priors: why and how to choose weakly  
523 informative priors in Bayesian analyses. - *Oikos*: oik.05985.
- 524 Lomas, E. et al. 2019. Movement Ecology of Northern Pacific Rattlesnakes (*Crotalus o. oregonus*) in  
525 Response to Disturbance. - *Herpetologica* 75: 153.
- 526 Loveridge, A. J. et al. 2017. The landscape of anthropogenic mortality: how African lions respond to  
527 spatial variation in risk (C Howe, Ed.). - *J Appl Ecol* 54: 815–825.
- 528 Luiselli, L. and Akani, G. C. 2002. Is thermoregulation really unimportant for tropical reptiles?  
529 Comparative study of four sympatric snake species from Africa. - *Acta Oecologica* 23: 59–68.
- 530 Marshall, B. M. et al. 2018. Hits Close to Home: Repeated Persecution of King Cobras (*Ophiophagus*  
531 *hannah*) in Northeastern Thailand. - *Tropical Conservation Science* 11: 194008291881840.
- 532 Marshall, B. M. et al. 2019. Space fit for a king: spatial ecology of king cobras (*Ophiophagus*  
533 *hannah*) in Sakaerat Biosphere Reserve, Northeastern Thailand. - *Amphibia-Reptilia* 40: 163–  
534 178.
- 535 Miranda, E. B. P. de 2017. The Plight of Reptiles as Ecological Actors in the Tropics. - *Frontiers in*  
536 *Ecology and Evolution* 5: 159.
- 537 Mitrovich, M. J. et al. 2009. Behavioral Response of the Coachwhip (*Masticophis flagellum*) to  
538 Habitat Fragment Size and Isolation in an Urban Landscape. - *Journal of Herpetology* 43:  
539 646–656.
- 540 Mueller, T. et al. 2011. How landscape dynamics link individual- to population-level movement  
541 patterns: a multispecies comparison of ungulate relocation data: Population-level movement  
542 patterns. - *Global Ecology and Biogeography* 20: 683–694.
- 543 Murphy, J. C. et al. 1999. The ecology of the water snakes of Ban Tha Hin, Songkhla Province  
544 Thailand. - *Natural History Bulletin Siam Society* 47: 129–147.
- 545 Nopper, J. et al. 2017. A structurally enriched agricultural landscape maintains high reptile diversity  
546 in sub-arid south-western Madagascar (C Bellard, Ed.). - *J Appl Ecol* 54: 480–488.
- 547 Oksanen, J. et al. 2019. *vegan: Community Ecology Package*.
- 548 Parent, C. and Weatherhead, P. J. 2000. Behavioral and life history responses of eastern massasauga  
549 rattlesnakes (*Sistrurus catenatus catenatus*) to human disturbance. - *Oecologia* 125: 170–178.
- 550 Patin, R. et al. 2018. *segclust2d: Bivariate Segmentation/Clustering Methods and Tools*.
- 551 Pebesma, E. J. and Bivand, R. S. 2005. Classes and methods for spatial data in R. - *R News* 5: 9–13.
- 552 Pedersen, T. L. and Cramer, F. 2018. *scico: Colour Palettes Based on the Scientific Colour-Maps*. in  
553 press.

- 554 Prange, S. et al. 2004. Influences of anthropogenic resources on raccoon (*Procyon lotor*) movements  
555 and spatial distribution. - Journal of Mammalogy 85: 8.
- 556 Pulsford, S. A. et al. 2017. Remnant vegetation, plantings and fences are beneficial for reptiles in  
557 agricultural landscapes (C Bellard, Ed.). - J Appl Ecol 54: 1710–1719.
- 558 Purvis, A. et al. 2000. Predicting extinction risk in declining species. - Proceedings of the Royal  
559 Society B: Biological Sciences 267: 1947–1952.
- 560 R Core Team 2019. R: A language and environment for statistical computing. - R Foundation for  
561 Statistical Computing.
- 562 R Studio Team 2019. RStudio: Integrated Development Environment for R. - RStudio, Inc.
- 563 Rio-Maior, H. et al. 2019. Designing the landscape of coexistence: Integrating risk avoidance, habitat  
564 selection and functional connectivity to inform large carnivore conservation. - Biological  
565 Conservation 235: 178–188.
- 566 Robertson, B. A. et al. 2013. Ecological novelty and the emergence of evolutionary traps. - Trends in  
567 Ecology & Evolution 28: 552–560.
- 568 Robinson, D. and Hayes, A. 2019. broom: Convert statistical analysis objects into tidy tibbles.
- 569 Row, J. R. et al. 2012. Movements and Habitat Use of Eastern Foxsnakes (*Pantherophis gloydi*) in  
570 Two Areas Varying in Size and Fragmentation. - Journal of Herpetology 46: 94–99.
- 571 Rytwinski, T. et al. 2016. How effective is road mitigation at reducing road-kill? A meta-analysis. -  
572 PLoS ONE 11: 1–25.
- 573 Sakaerat Environmental Research Station 2018. Weather Data. in press.
- 574 Shankar, P. G. et al. 2013. Factors influencing human hostility to King Cobras (*Ophiophagus hannah*)  
575 in the Western Ghats of India. - Hamadryad 36: 91–100.
- 576 Shine, R. and Madsen, T. 1996. Is Thermoregulation Unimportant for Most Reptiles? An Example  
577 Using Water Pythons (*Liasis fuscus*) in Tropical Australia. - Physiological Zoology 69: 252–  
578 269.
- 579 Siers, S. R. et al. 2018. Behavioral differences following ingestion of large meals and consequences  
580 for management of a harmful invasive snake: A field experiment. - Ecology and Evolution 8:  
581 10075–10093.
- 582 Signer, J. et al. 2018. Animal movement tools (amt): R package for managing tracking data and  
583 conducting habitat selection analyses. - Ecology and Evolution 9: 880–890.
- 584 Silva, I. et al. 2018. Using dynamic Brownian Bridge Movement Models to identify home range size  
585 and movement patterns in king cobras (UG Munderloh, Ed.). - PLOS ONE 13: e0203449.
- 586 Silva, I. et al. 2020a. High roadkill rates in the Dong Phrayayen-Khao Yai World Heritage Site:  
587 conservation implications of a rising threat to wildlife. - Anim Conserv: acv.12560.
- 588 Silva, I. et al. 2020b. Revisiting reptile home ranges: moving beyond traditional estimators with  
589 dynamic Brownian Bridge Movement Models. - bioRxiv: 23.
- 590 Slavenko, A. et al. 2016. Late Quaternary reptile extinctions: size matters, insularity dominates: Size-  
591 biases in reptile extinctions. - Global Ecology and Biogeography 25: 1308–1320.

- 592 Strine, C. T. et al. 2014. Mortality of a wild king cobra, *Ophiophagus hannah* Cantor, 1836  
593 (Serpentes: Elapidae) from Northeast Thailand after ingesting a plastic bag. - Asian  
594 Herpetological Research 5: 284–286.
- 595 Strine, C. et al. 2018. Spatial ecology of a small arboreal ambush predator, *Trimeresurus macrops*  
596 Kramer, 1977, in Northeast Thailand. - Amphibia-Reptilia 39: 335–345.
- 597 Suraci, J. P. et al. 2019. Fear of humans as apex predators has landscape-scale impacts from mountain  
598 lions to mice (G Grether, Ed.). - Ecol Lett: ele.13344.
- 599 Thurfjell, H. et al. 2014. Applications of step-selection functions in ecology and conservation. -  
600 Movement Ecology in press.
- 601 Todd, B. D. et al. 2017. Species traits explaining sensitivity of snakes to human land use estimated  
602 from citizen science data. - Biological Conservation 206: 31–36.
- 603 Tucker, M. A. et al. 2018. Moving in the Anthropocene: Global reductions in terrestrial mammalian  
604 movements. - Science 359: 466–469.
- 605 Valeix, M. et al. 2012. Behavioural adjustments of a large carnivore to access secondary prey in a  
606 human-dominated landscape: *Wild prey, livestock and lion ecology*. - Journal of Applied  
607 Ecology 49: 73–81.
- 608 Van Moorter, B. et al. 2016. Movement is the glue connecting home ranges and habitat selection (L  
609 Börger, Ed.). - J Anim Ecol 85: 21–31.
- 610 Vogt, K. et al. 2018. Suitability of GPS telemetry for studying the predation of Eurasian lynx on  
611 small- and medium-sized prey animals in the Northwestern Swiss Alps. - Eur J Wildl Res 64:  
612 73.
- 613 Walker, A. 2018. openxlsx: Read, write and edit XLSX files.
- 614 Wasko, D. K. and Sasa, M. 2012. Food resources influence spatial ecology, habitat selection, and  
615 foraging behavior in an ambush-hunting snake (Viperidae: *Bothrops asper*): An experimental  
616 study. - Zoology 115: 179–187.
- 617 Wickham, H. 2007. Reshaping Data with the reshape Package. - Journal of Statistical Software 21: 1–  
618 20.
- 619 Wickham, H. 2009. ggplot2: Elegant Graphics for Data Analysis. - Springer-Verlag New York.
- 620 Wickham, H. 2019a. forcats: Tools for working with categorical variables (factors).
- 621 Wickham, H. 2019b. stringr: Simple, consistent wrappers for common string operations.
- 622 Wickham, H. and Seidel, D. 2019. scales: Scale functions for visualization.
- 623 Wickham, H. et al. 2018. readr: Read Rectangular Text Data.
- 624 Wickham, H. et al. 2019. dplyr: A Grammar of Data Manipulation.
- 625 Wilke, C. O. 2018. ggribes: Ridgeline Plots in “ggplot2.”
- 626 Wilke, C. O. 2019. cowplot: Streamlined plot theme and plot annotations for “ggplot2.”

- 627 Wolf, A. J. et al. 2013. Effects of Habitat Disturbance on Texas Horned Lizards: An Urban Case  
628 Study. - *Herpetologica* 69: 265–281.
- 629 Worton, B. J. 1989. Kernel Methods for Estimating the Utilization in Home-Range Studies. - *Ecology*  
630 70: 164–168.
- 631
